# Supplementary material
Source: HighWire-hosted journal article supplement (https://bmjopen.bmj.com/content/8/5/e018020)
Supplement: inline-supplementary-material-1 [file inline-supplementary-material-1.pdf]

## Annexure

### Estimation of out-of-pocket expenditure indicators and related indicators

#### *a. Out-of-pocket payments*

Total out-of-pocket (OOP) payment has been defined as the summation of all kinds of direct expenditure on purchase of medical care including expenditure on family planning devices and transportation costs to access medical care by households either as inpatient or outpatient. According to the NSSO household questionnaire the main item of expenditure considered for inpatient and outpatient are presented in Table A-I.

Table A-I: Main items of expenditure considered for inpatient and outpatient in the NSSO questionnaire

| Inpatient                           |                                 | Outpatient                          |                                 |
|-------------------------------------|---------------------------------|-------------------------------------|---------------------------------|
| Heads of expenditure                | Item code in NSSO questionnaire | Heads of expenditure                | Item code in NSSO questionnaire |
| medicine                            | 410                             | medicine                            | 420                             |
| X-ray, ECG, pathological test, etc. | 411                             | X-ray, ECG, pathological test, etc. | 421                             |
| doctor's/surgeon's fee              | 412                             | doctor's/ surgeon's fee             | 422                             |
| hospital & nursing home charges     | 413                             | family planning devices             | 423                             |
| other medical expenses              | 414                             | other medical expenses              | 424                             |
| <b>Total inpatient</b>              | <b>419=410-414</b>              | <b>Total outpatient</b>             | <b>429=420-424</b>              |

The reference period of inpatient and outpatient expenditure in the consumer expenditure surveys are 1 year and 1 month respectively. Based on the information presented in Table A-I, total inpatient expenditure, outpatient expenditure and total OOP expenditure were estimated by converting inpatient expenditure for one month. Accordingly, households with any OOP have been defined as households reporting positive OOP (OOP>0) either as inpatient or outpatient or both.

#### *b. Per person monthly OOP and OOP share*

Per person monthly OOP is defined as total monthly OOP divided by household size for each household.

The financial burden of health expenses by households has also been estimated in terms of OOP as a share of total household expenditure and alternatively as a share of total non-food expenditure of households..

$$Sh_{OOP} = T / exp \dots\dots\dots (A.1)$$

Where, 'T' is total OOP payments and 'exp' is household total (non-food) expenditure by households.

**c. Catastrophic payments and headcount**

Further, OOP payments are defined as catastrophic when OOP payments as a portion of total household resources are in excess of a certain threshold. A household is said to have incurred catastrophic payments if  $T/exp > Z$ , where 'T' and OOP are the same as in equation (A.1) and 'Z' is a certain threshold. The latter is arbitrary and in general, estimates are presented for a range of values for z (5, 10, 15, 25 and 40 per cent).

Accordingly, the headcount ratio of catastrophic payment is calculated as follows:

$$cat_i = \frac{1}{n} \sum 1 \left( \frac{T}{exp} > Z_i \right) \dots\dots\dots (A.2)$$

Where,  $Cat_i$  is catastrophic headcounts of households with OOP share exceeding a threshold defined as 'i' per cent of total household total (non-food) expenditure,  $1(.)$  is an indicator function, which takes the value 1 if  $T/exp > Z_i$  is true and 0 otherwise; n is the number of households incurring expenditure on health for various thresholds;  $Z_1, Z_2, Z_3 \dots\dots$  are the respective thresholds of the OOP share.

**d. Poverty headcount**

The usual headcount ratio of poverty is calculated as:

$$Gross\ HP = 1/n \sum 1 (x_i \leq PL) \dots\dots\dots (A.3)$$

where:  $1(.)$  is a function, taking the value 1 if person belong to a household with consumption expenditure lower the value of poverty line value, x= Household total consumption expenditure; PL= Poverty Line and n is total population.

Headcount of poverty after deducting OOP from household consumption expenditure can be defined as:

$$\text{Net HP} = 1/n \sum 1 ((xi-T) \leq PL). \dots\dots\dots (A.4)$$

where: T= per capita OOP

The OOP induced poverty headcount finally is estimated as: (Gross HP - Net HP).

**e. Poverty gap**

Poverty gap is defined as difference between values of poverty lines and household consumption expenditure for the poor as defined in the sub-section d above. Using the household level data poverty gap for the poor is estimated as follows:

$$\text{Gross poverty gap} = 1/n \sum 1 (xi - PL) | \text{ if } i=\text{poor} \dots\dots\dots (A.5)$$

In equation A.5 'xi-PL' is the difference between household expenditure per person and poverty line. For all positive values of this difference mean gap is estimated. Finally, poverty gap net of OOP payments is estimated as follows:

$$\text{Net poverty gap} = 1/n \sum 1 ((xi-T) - PL) | \text{ if } i=\text{poor after netting OOP} \dots\dots\dots (A.6)$$

Table A-II. Prevalence and average per episode total and medicine out of pocket payments by disease conditions in 2014

|                    | Outpatient 15 days recall |       |             |      |                   |      | Inpatient 365 days recall |       |             |      |                   |      |
|--------------------|---------------------------|-------|-------------|------|-------------------|------|---------------------------|-------|-------------|------|-------------------|------|
|                    | Prevalence                |       | Per episode |      | estimated monthly |      | Prevalence                |       | Per episode |      | estimated monthly |      |
| Ailment            | Number of episodes        | %     | Total OOP   | Drug | Total OOP         | Drug | Number of episodes        | %     | Total OOP   | Drug | Total OOP         | Drug |
| Fever              | 2,71,43,431               | 22.71 | 488         | 280  | 975               | 561  | 74,12,043                 | 12.95 | 8670        | 2329 | 713               | 191  |
| TB/Filaria/Tetanus | 11,08,425                 | 0.93  | 524         | 287  | 1047              | 573  | 6,14,933                  | 1.07  | 14731       | 4134 | 1,211             | 340  |
| STD/HIV/AIDS       | 1,20,714                  | 0.1   | 538         | 268  | 1076              | 536  | 88,935                    | 0.16  | 6906        | 1633 | 568               | 134  |
| Vector-borne       | 33,33,651                 | 2.79  | 549         | 332  | 1097              | 663  | 22,65,189                 | 3.96  | 10288       | 2460 | 846               | 202  |

|                         |             |       |      |          |      |          |             |       |       |           |       |           |
|-------------------------|-------------|-------|------|----------|------|----------|-------------|-------|-------|-----------|-------|-----------|
| Cancers                 | 4,52,513    | 0.38  | 2527 | 176<br>3 | 5054 | 352<br>6 | 9,78,764    | 1.71  | 62297 | 1403<br>7 | 5,121 | 1,15<br>4 |
| Blood disease           | 10,26,129   | 0.86  | 1322 | 731      | 2643 | 146<br>3 | 8,10,752    | 1.42  | 15035 | 3650      | 1,236 | 300       |
| Diabetes                | 1,17,55,081 | 9.84  | 683  | 456      | 1367 | 911      | 8,17,199    | 1.43  | 15746 | 4224      | 1,294 | 347       |
| Other Metabolic         | 20,50,282   | 1.72  | 712  | 340      | 1423 | 679      | 2,60,707    | 0.46  | 15429 | 3600      | 1,268 | 296       |
| Mental disorders        | 61,56,374   | 5.15  | 690  | 451      | 1380 | 902      | 24,87,836   | 4.35  | 26428 | 6685      | 2,172 | 549       |
| Eye/Ear                 | 24,67,286   | 2.06  | 950  | 454      | 1899 | 908      | 20,82,420   | 3.64  | 11350 | 1407      | 933   | 116       |
| Cardiovascular diseases | 1,55,65,223 | 13.02 | 645  | 449      | 1289 | 899      | 37,82,374   | 6.61  | 34167 | 6129      | 2,808 | 504       |
| Respiratory diseases    | 1,69,58,670 | 14.19 | 478  | 328      | 955  | 656      | 21,40,762   | 3.74  | 14491 | 3325      | 1,191 | 273       |
| Gastroenterlogy         | 77,13,330   | 6.45  | 809  | 434      | 1617 | 869      | 45,40,520   | 7.93  | 19587 | 4260      | 1,610 | 350       |
| Skin                    | 28,34,892   | 2.37  | 522  | 370      | 1043 | 740      | 3,80,346    | 0.66  | 12123 | 3514      | 996   | 289       |
| Musculo-Skeletal        | 1,32,29,065 | 11.07 | 622  | 391      | 1244 | 782      | 19,66,211   | 3.44  | 24379 | 4677      | 2,004 | 384       |
| Genito-Urinary          | 21,91,953   | 1.83  | 1183 | 747      | 2365 | 149<br>4 | 28,01,133   | 4.89  | 27085 | 5094      | 2,226 | 419       |
| Obstetric               | 3,64,060    | 0.3   | 1448 | 765      | 2896 | 152<br>9 | 22,64,628   | 3.96  | 13050 | 2189      | 1,073 | 180       |
| Injuries                | 19,93,646   | 1.67  | 1522 | 730      | 3045 | 146<br>0 | 46,19,876   | 8.07  | 26242 | 6000      | 2,157 | 493       |
| Others                  | 28,92,298   | 2.42  | 655  | 426      | 1310 | 853      | 12,97,049   | 2.27  | 30196 | 6666      | 2,482 | 548       |
| Childbirth              | 1,46,562    | 0.12  | 585  | 398      | 1169 | 797      | 1,56,17,000 | 27.29 | 8508  | 1729      | 699   | 142       |
